# Supplementary material for: Novel Approach Identifies SNPs in SLC2A10 and KCNK9 with Evidence for Parent-of-Origin Effect on Body Mass Index
Source: PLoS Genet. 2014 Jul 31;10(7):e1004508. doi: 10.1371/journal.pgen.1004508 (PMC4117451; doi:10.1371/journal.pgen.1004508)
Supplement: Table S3 — Information on the genotyping methods in the participating cohorts. (XLSX) [file pgen.1004508.s008.xlsx]

## Sheet: Sheet1
GWAS of unrelated individuals
	Genotyping						Imputation
Study	Platform	Genotype calling algorithm	Inclusion criteria			SNPs that met QC criteria	Imputation software	Inclusion criteria		SNPs in meta-analysis	λGC	Analysis software
			MAF	Call rate*	p for HWE			MAF	Imputation quality*		combined
ARIC	Affymetrix Genome-Wide Human SNP Array 6.0	Birdseed	≥ 1%	≥90%	>10-6	685812	MACH v1.0.16	none	r2_hat ≥ 0.30	2557240	0.9095	R
CoLaus	Affymetrix GeneChip Human Mapping 500K	BRLMM	≥ 1%	≥ 70%	> 10-7	390631	IMPUTE	none	none	2557249	0.9952	QUICKTEST
EGCUT1	Illumina OmniExpress	GenomeStudio	≥ 1%	≥ 95%	> 10-6	615575	IMPUTE	none	proper-info ≥ 0.40	2563928	0.9721	QUICKTEST
EGCUT2	Illumina Human370CNV	GenomeStudio	≥ 1%	≥ 95%	> 10-6	299484	IMPUTE	none	proper-info ≥ 0.40	2550524	1.0263	QUICKTEST
EPIC	Affymetrix GeneChip Human Mapping 500K	BRLMM	≥ 1%	≥ 90%	> 10-6	397438	IMPUTE	none	proper-info ≥ 0.40	13979319	1.0077	QUICKTEST
EUNN-Cases	Affymetrix SNP5.0	BRLMM	≥ 1%	≥ 90%	> 10-7	392949	MACH	none	none	2543887	0.95	QUICKTEST
Fenland	Affymetrix SNP5.0	BRLMM	≥ 1%	≥ 95%	> 10-6	360602	IMPUTE	none	proper-info ≥ 0.40	13136297	1.0423	QUICKTEST
Hypergenes - cases	Illumina Human1M-Duov3_B	GenCall, Beadstudio	≥ 1%	≥ 90%	> 10-7	Center I: 861759, Center II: 872576	MACH	none	none	2543887	0.893	QUICKTEST
Hypergenes - controls	Illumina Human1M-Duov3_B	GenCall, Beadstudio	≥ 1%	≥ 90%	> 10-7	Center I: 861759, Center II: 872576	MACH	none	none	2543887	0.904	QUICKTEST
KORAF3	Affymetrix GeneChip Human Mapping 500K	BRLMM	none	none	none	490032	MACH v1 .0.9	>1%	r2_hat ≥ 0.30	2557252	1.027	R
KORAF4	Affy 6.0	Birdseed	none	none	none	909622	IMPUTE v0.4.2	>1%	proper_info ≥ 0.40	2543887	1.019	R
LifeLines	Illumina Cyto SNP12 v2	GenomeStudio	≥ 1%	≥ 95%	> 10-4	257.581	BEAGLE v3.1.0	none	none	8	--	QUICKTEST
LOLIPOP	Illumina Human610	BeadStudio	≥ 1%	≥ 90%	> 10-6	544620	IMPUTE	none	none	2564225	0.9211	QUICKTEST
NFBC-1966	Illumina HumanCNV-370DUO Analysis BeadChip	Standard Illumina BeadStudio	≥ 5%	≥ 95%	> 10-4	328007	IMPUTE	none	proper-info ≥ 0.40	3855909	0.9255	R
SCCS	Illumina Human1M-Duov3_B	GenCall, Beadstudio	≥ 1%	≥ 90%	> 10-7	912756	MACH	none	none	2543887	0.9561	QUICKTEST
SHIP	Affymetrix Human SNP Array 6.0	Birdseed V2	≥ 0%	≥ 0%	≥ 0%	869224	IMPUTE v0.5.0	none	none	2743194	0.9861	QUICKTEST
SHIP-Trend	Illumina Human Omni 2.5	GenCall, Beadstudio	>0%	>90%	> 10-4	1782967	IMPUTE v2.1.2.3	none	none	2627980	0.9164	QUICKTEST
TwinsUK	Illumina / HumanHap 300 & 550	Illuminus	≥ 1%	≥ 95%	> 10-6	295702	IMPUTE	none	proper-info ≥ 0.40	3044064	0.9977	QUICKTEST
Trio look-ups
	Genotyping						Imputation
Study	Platform	Genotype calling algorithm	Inclusion criteria			SNPs that met QC criteria	Imputation software	Inclusion criteria		SNPs in meta-analysis	λGC	Analysis software
			MAF	Call rate*	p for HWE			MAF	Imputation quality*		combined
QIMR	HumanCNV370-Quadv3 HumanCNV370-Quadv3 Human610-Quad Human317K Human610-Quad Human610-Quad Human610-Quad	Bead studio	> 1%	> 99	> 10-6	312,937-531,042	Mach	0.01	r2 > 0.30	8	NA	R
FamHS	Illuminia (550K, 610k, and 1Million)	Bead studio	<1% or >99%	>98%	p>1E-06	501,404 (550K), 530,979 (610K), and 910,456 (1Mil)	MINIMAC -version 10.09.12	none	none	8	NA	R
FHS	Affymetrix 500K	BRLMM	0.01	≥ 0.95	1e-06	413905	MACH 1.0.16	0.01	> 0.3	8	NA	R
ALSPAC	Children: Illumina 550k; Mothers: Illumina 660quad	Gencall	>=1%	>=95%	Children: >5x10-7; Mothers 1x10-7	NA	MACH	>1%	r2_hat >=0.30	8	NA	R
GS	Illumina OmniExpress+exome	GenomeStudio	none	≥ 98%	> 10-6	NA	SHAPEIT and IMPUTE2	>0.05%	none	8	NA	R
