# Supplementary material for: Novel Approach Identifies SNPs in SLC2A10 and KCNK9 with Evidence for Parent-of-Origin Effect on Body Mass Index
Source: PLoS Genet. 2014 Jul 31;10(7):e1004508. doi: 10.1371/journal.pgen.1004508 (PMC4117451; doi:10.1371/journal.pgen.1004508)
Supplement: Table S5 — Parental asymmetry test results for our 6 candidate SNPs in adolescent population. (XLSX) [file pgen.1004508.s010.xlsx]

## Sheet: Sheet1
CHR	SNP	Allele 1	Allele 2	A_result	B_result	p_PAT	perc_mother
2	rs155570	G	A	98	85	0.3751	0.5355
4	rs1398940	T	C	125	112	0.4358	0.5274
8	rs2471083	A	G	112	111	1	0.5022
15	rs1345919	T	A	107	115	0.6386	0.482
16	rs6500550	T	C	119	103	0.3141	0.536
20	rs3091869	T	C	135	116	0.2558	0.5378
CHR	Chromosome
SNP	rs number
Allele, Allele2	risk and other allele
A_result	counts of maternally transmitted alleles
B_result	counts of paternally transmitted alleles
p_PAT	p-values of the PAT (parental asymmetry test)
perc_mother	percent of maternally transmitted alleles
